# Supplementary material for: Nrf2/antioxidant pathway mediates β cell self-repair after damage by high-fat diet–induced oxidative stress
Source: JCI journal article supplement (doi:10.1172/jci.insight.92854), 2017-12-20
Supplement: sd1 [file 1]

Table 1. Non-fasting glucose levels during HFD before and after reversal to standard 17% fat chow diets. Values are shown for the day of sacrifice, the day of diet reversal, and the last days of the study 2 and 3 weeks later. For the 9, 18, and 28 day groups some animals were sacrificed at the diet reversal times, and some were sacrificed 2-3 weeks later for imaging studies. Data are shown as mean +/- SE; n = 4 for all subgroups. In all instances the 2 and 3 week post-diet reversal glucose levels are significantly less than the paired reversal day data (p<0.05-0.001). The 2 and 3 week post-diet reversal levels for the Day 9 group are significantly less than the corresponding data for Day 18 and Day 28 post-reversal data (p<0.001).

|                              | Sacrifice  | Reversal Day | Week After Reversal |            |
|------------------------------|------------|--------------|---------------------|------------|
|                              |            |              | 2 wk                | 3 wk       |
| <b>GROUP A: Pilot Study</b>  |            |              |                     |            |
| Day 1                        |            | 168 +/- 5    | 129 +/- 6           | 139 +/- 5  |
| Day 2                        |            | 163 +/- 11   | 123 +/- 7           | 140 +/- 6  |
| Day 4                        |            | 229 +/- 49   | 126 +/- 9           | 115 +/- 6  |
| Day 7                        |            | 381 +/- 41   | 159 +/- 7           | 155 +/- 14 |
| Day 9                        |            | 516 +/- 46   | 194 +/- 61          | 152 +/- 16 |
| <b>Group B: 9 Day Study</b>  |            |              |                     |            |
| Day 9                        | 387 +/- 23 | 348 +/- 30   | 158 +/- 5           | 126 +/- 3  |
| Standard 17% Chow Controls   |            | 161 +/- 7    | 150 +/- 6           | 158 +/- 7  |
| HFD Controls                 |            | 370 +/- 47   | 519 +/- 15          | 563 +/- 20 |
| <b>Group C: 18 Day Study</b> |            |              |                     |            |
| Day 18                       | 533 +/- 46 | 509 +/- 21   | 197 +/- 46          | 215 +/- 21 |
| Standard 17% Chow Controls   |            | 165 +/- 6    | 155 +/- 6           | 162 +/- 5  |
| HFD Controls                 |            | 518 +/- 18   | 541 +/- 18          | 529 +/- 18 |
| <b>Group D: 28 Day Study</b> |            |              |                     |            |
| Day 28                       | 576 +/- 49 | 463 +/- 31   | 307 +/- 47          |            |
| Standard 17% Chow Controls   |            | 158 +/- 18   | 170 +/- 10          |            |
| HFD Controls                 |            | 563 +/- 20   | 547 +/- 49          |            |
